# Supplementary material
Source: PubMed Central journal article supplement (PMC2757976)

## ONLINE SUPPLEMENTAL DATA

Supplemental figure S1 describes the immortalized macrophage cell lines that were generated from wild-type (C57BL/6) and Mal deficient mice. Additional macrophage cell lines have been generated from TLR4, TLR2 and TLR9 Kos. Lines derived from these mice all had the expected response to a panel of cognate and non-cognate ligands (data not shown). These cell lines have been banked with the American Type Culture Collection and BEI Resources and are available to eligible investigators.

### FIGURE LEGEND

**Fig. S1. *Immortalized macrophage-like cell lines from wild-type and knockout mice retain the characteristics of bone marrow derived macrophages.*** J2 recombinant retrovirus was used for generating immortalized macrophage cell lines. Macrophage phenotype was verified by surface expression of the markers CD11b (M1/70; BD Pharmingen) and F4/80 (BM8; eBiosciences) (A) as well as functional responsiveness to a panel of TLR ligands (B). The cells were treated overnight with the indicated ligands. Supernatants were subsequently analyzed for the presence of TNF $\alpha$  by ELISA. Results are reported as the mean of triplicate determinations  $\pm$  SD.

FIGURE S1

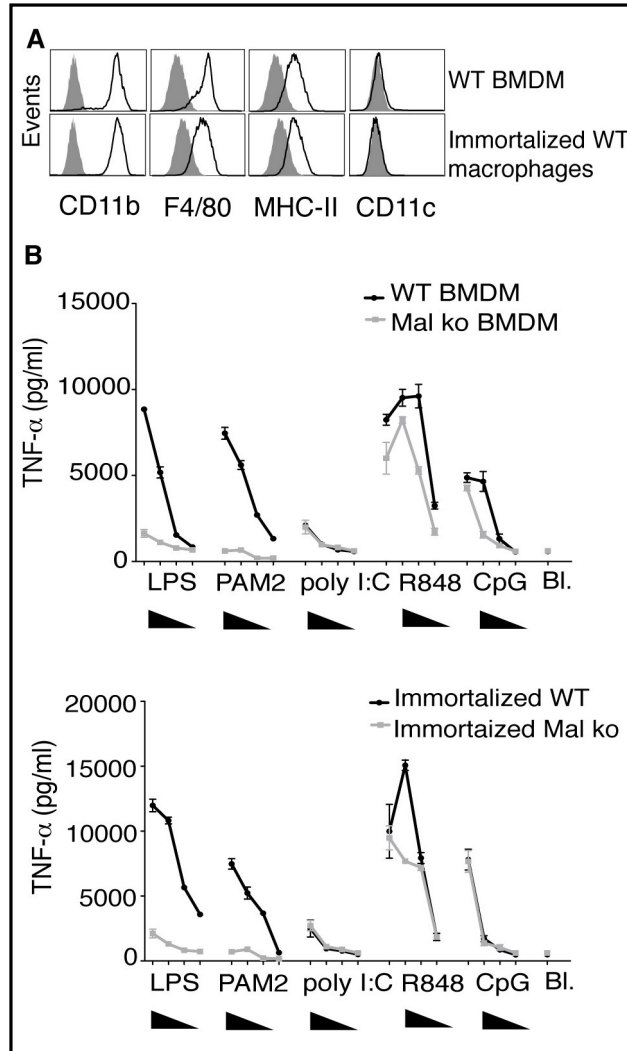

Supplement: supp_M109.014886_jbc.M109.014886-1.pdf [file supp_M109.014886_jbc.M109.014886-1.pdf]
